# Supplementary material for: Systemic Administration of G-CSF Accelerates Bone Regeneration and Modulates Mobilization of Progenitor Cells in a Rat Model of Distraction Osteogenesis
Source: PubMed Central journal article supplement (PMC8037338; doi:10.3390/ijms22073505), 2021-03-28
Supplement: ijms-22-03505-s001.pdf [file ijms-22-03505-s001.pdf]

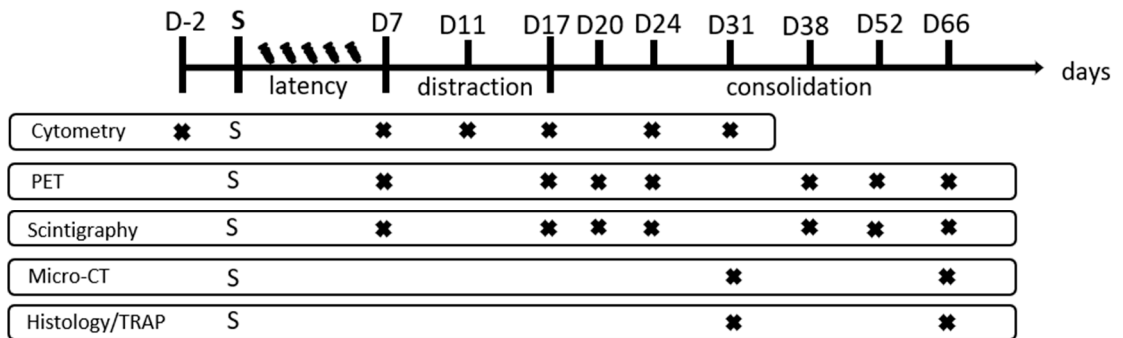

**Figure S1:** Representation of the experimental design. S = Surgery. Systemic injections of G-CSF and placebo are represented by ▲. The crosses indicate the dates when the different analyses were performed.

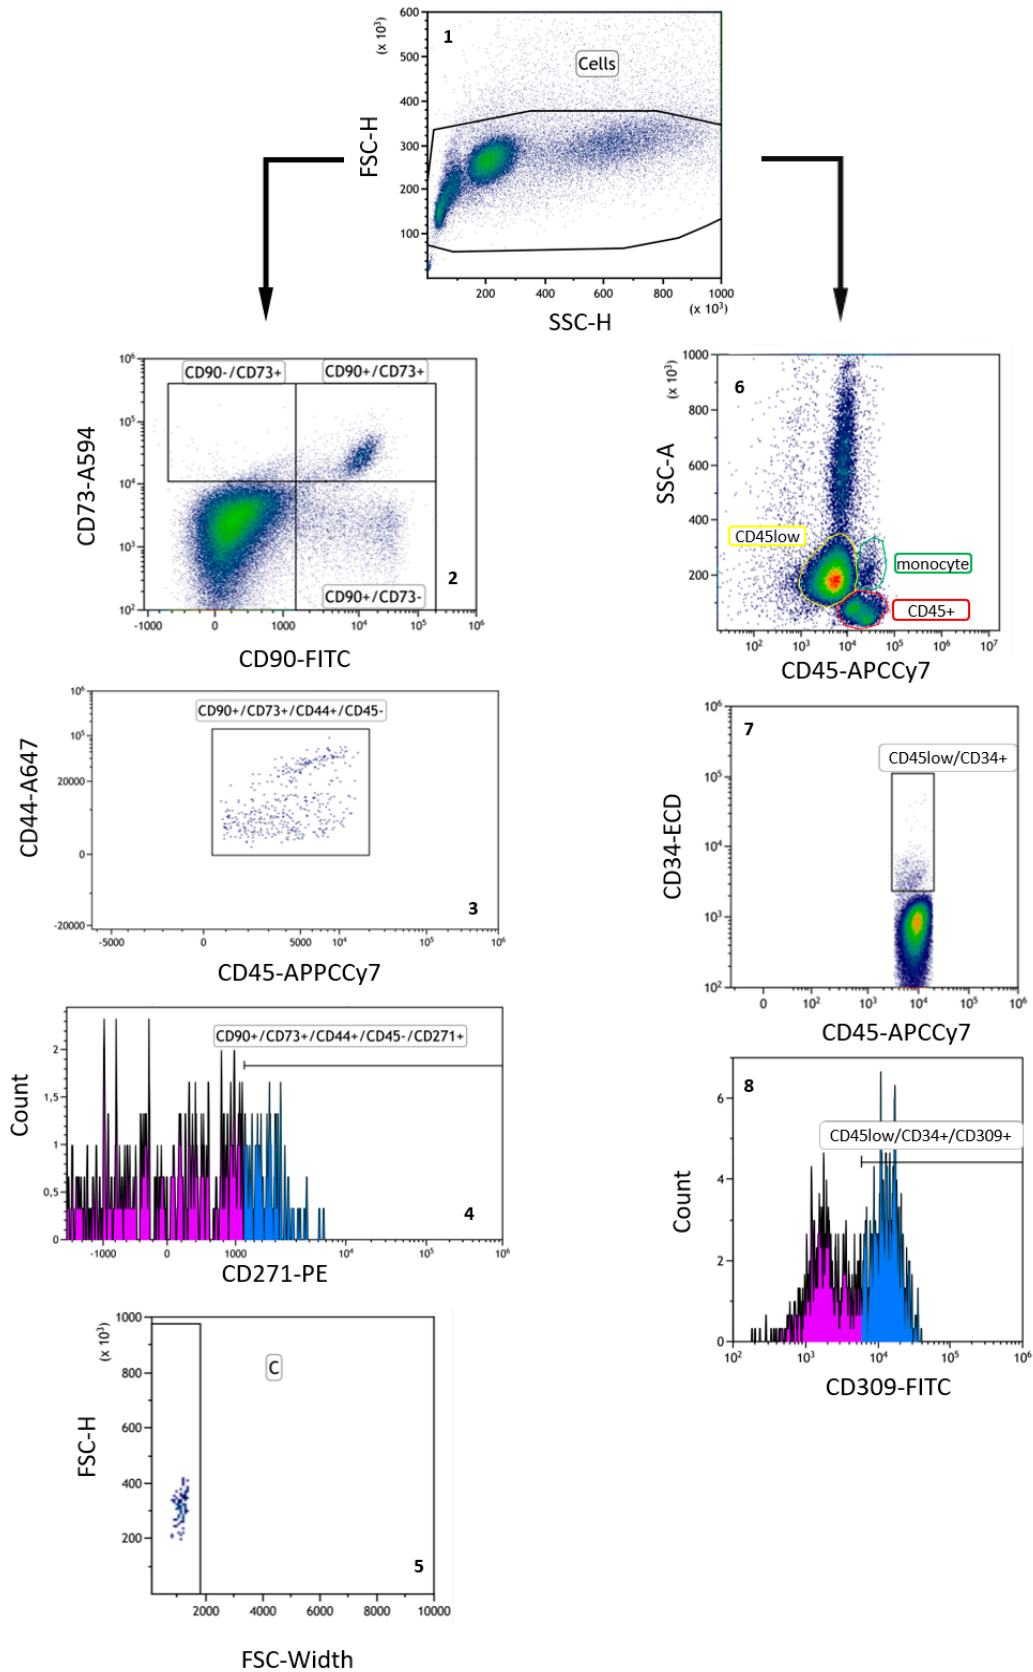

**Figure S2.** Representative flow cytometry gating strategy for each cell types depending on their immunophenotypic profile. Plot 2 to 5 represent the MSC gating, with plot 4 for MSC CD271+. Then, plot 7 represent the HSPC population and the plot 8 the EPCs cell type.

**Table S1.** Flow cytometry markers.

| <b>Cell type</b> | <b>Surface Markers</b> | <b>Comment</b>                         | <b>Dosage</b>              |
|------------------|------------------------|----------------------------------------|----------------------------|
| HSPC             | CD34+                  | Hematopoietic maker                    | 10 $\mu$ L no dilution     |
|                  | CD45 <sup>low</sup>    | Leukocyte marker                       | 2 $\mu$ L no dilution      |
| EPC              | CD34+                  | Hematopoietic marker                   | 10 $\mu$ L no dilution     |
|                  | CD45 <sup>low</sup>    | Leukocyte marker                       | 2 $\mu$ L no dilution      |
|                  | CD309+                 | Endothelial marker                     | 2 $\mu$ L no dilution      |
| MSC              | CD44+                  | Express by most mammalian cells        | 3 $\mu$ L diluted 20 times |
|                  | CD73+                  | Mesenchymal marker                     | 4 $\mu$ L no dilution      |
|                  | CD90+                  | Mesenchymal marker                     | 2 $\mu$ L no dilution      |
|                  | CD271+                 | Marker associated with stemness of MSC | 4 $\mu$ L no dilution      |
|                  | CD45-                  | Leukocyte marker                       | 2 $\mu$ L no dilution      |
